# Disentangling taxonomy within the *Rhabditis* (*Pellioiditis*) *marina* (Nematoda, Rhabditidae) species complex using molecular and morphological tools

S. DERYCKE<sup>1,3\*</sup>, G. FONSECA<sup>1,2</sup>, A. VIERSTRAETE<sup>3,4</sup>, J. VANFLETEREN<sup>3,4</sup>, M. VINCX<sup>1</sup> and T. MOENS<sup>1</sup>

<sup>1</sup>Department of Biology, Marine Biology Section, Ghent University, Krijgslaan 281 (S8), 9000 Ghent, Belgium

<sup>2</sup>Alfred Wegener Institute for Polar and Marine Research, Deep-Sea Research Group, Am Handelshafen 12 (Co, ABC), D-27570 Bremerhaven, Germany

<sup>3</sup>Department of Biology, Ghent University, K.L. Ledeganckstraat 35, 9000 Ghent, Belgium

<sup>4</sup>CeMoFe, Ghent University, K.L. Ledeganckstraat 35, 9000 Ghent, Belgium

Received 15 September 2006; accepted for publication 15 May 2007

Correct taxonomy is a prerequisite for biological research, but currently it is undergoing a serious crisis, resulting in the neglect of many highly diverse groups of organisms. In nematodes, species delimitation remains problematic due to their high morphological plasticity. Evolutionary approaches using DNA sequences can potentially overcome the problems caused by morphology, but they are also affected by theoretical flaws. A holistic approach with a combination of morphological and molecular methods can therefore produce a straightforward delimitation of species. The present study investigates the taxonomic status of some highly divergent mitochondrial haplotypes in the *Rhabditis* (*Pellioiditis*) *marina* species complex by using a combination of molecular and morphological tools. We used three molecular markers (COI, ITS, D2D3) and performed phylogenetic analyses. Subsequently, morphometric data from nearly all lineages were analysed with multivariate techniques. We included *R. (P.) mediterranea* and *R. (R.) nidrosiensis* to infer species status of the observed lineages. The results showed that highly divergent genotypic clusters were accompanied by morphological differences, and we created a graphical polytomous key for future identifications. This study indisputably demonstrates that *R. (P.) marina* and *R. (P.) mediterranea* belong to a huge species complex and that biodiversity in free-living marine nematodes may be seriously underestimated. © 2008 The Linnean Society of London, *Zoological Journal of the Linnean Society*, 2008, **152**, 1–15.

**ADDITIONAL KEYWORDS:** COI – D2D3 – delimitation – DNA-barcoding – holistic – ITS – *Pellioiditis marina* – polytomous key.

## INTRODUCTION

Nematodes have high species diversity as well as high abundances in marine, freshwater and terrestrial environments (Lambshhead, 2001; Floyd *et al.*, 2002). Species delimitation in nematodes remains problematic mainly due to the high phenotypic plasticity among populations, which reduces the number of diagnostic characters (Coomans, 2002; Nadler, 2002;

Powers, 2004). Molecular techniques and phylogenetic analyses can potentially overcome this problem, and barcoding appears to be a promising tool to assess biodiversity in free-living nematodes (Floyd *et al.*, 2002; Blaxter *et al.*, 2005; Bhadury *et al.*, 2006). However, deciding when individuals are sufficiently separate to discern them as different species based on sequence information is problematic in a number of taxa (e.g. cnidarians; Hebert, Ratnasingham & deWaard, 2003). This is mainly due to the lack of a straightforward relationship between genetic divergence and reproductive isolation (Ferguson, 2002), to

\*Corresponding author. Current address: Krijgslaan 281 (S8), 9000 Ghent, Belgium. E-mail: s.derycke@UGent.be

the occurrence of theoretical observations (such as incomplete lineage sorting, incongruence between gene and species trees; Avise, 1995; Nadler, 2002), and to discrepancies between morphological and molecular data. Many examples of morphological stasis despite substantial genetic differentiation have been observed in nematode genera (e.g. *Caenorhabditis*: Butler *et al.*, 1981; *Globodera* and *Heterodera*: Bakker & Bouwman-Smits, 1988), while morphological differentiation between genetically similar species has also been reported (De Ley *et al.*, 1999).

The problems of either morphological or molecular species delimitation can be resolved by applying a holistic approach, in which analyses of several independently evolving molecular markers circumvent the flaws of the molecular method. Subsequently, the observed phylogenetic lineages can be used to aim more precisely for diagnostic morphological characters between nematode lineages (Coomans, 2002; Fonseca, Derycke & Moens, in press).

In a recent study on the phylogeny and systematics of the Rhabditidae, Sudhaus & Fitch (2001) considered *Pellioiditis* Dougherty (1953) as one of the 15 subgenera within the genus *Rhabditis* Dujardin (1845). The subgenus comprises 18 species (Andrassy, 1983; Sudhaus & Nimrich, 1989; Gagarin, 2001), only four of which inhabit the marine environment. *Rhabditis* (*Pellioiditis*) *marina* Bastian, 1865 has been reported most frequently (Inglis & Coles, 1961; Sudhaus & Nimrich, 1989). The large intraspecific variability within *R. (P.) marina* is reflected in the description of a number of varieties, all but one of them later having been considered as synonyms of *R. (P.) marina* (Inglis & Coles, 1961). A recent study based on mitochondrial and nuclear DNA sequences revealed at least four cryptic species within *R. (P.) marina* all of which were sympatrically distributed on a fairly small geographical scale (100 km) (Derycke *et al.*, 2005) and were morphologically distinguishable (Fonseca *et al.*, in press). In addition, a temporal survey in which more than 1600 individuals were analysed led to the discovery of specimens with highly divergent DNA sequences (referred to as the Z lineages), of which the taxonomic position and phylogenetic relationships with the other lineages remained unclear (Derycke *et al.*, 2006).

The present study aims to elucidate the phylogenetic and taxonomic uncertainties in the *R. (P.) marina* species complex through a combination of molecular and morphological methods. We performed phylogenetic analyses on three genes (mitochondrial COI, nuclear ITS and D2D3 regions) and used concordant tree topologies between these genes as evidence for independent evolutionary histories. We subsequently used multivariate analyses of morphological characters to investigate whether the observed

genetic differences were accompanied by morphological differences and created a polytomous key for future identifications.

## MATERIAL AND METHODS

### SAMPLE COLLECTION AND PROCESSING

A detailed description of the sampling strategy and isolation protocol of *R. (P.) marina* has been described in Derycke *et al.* (2006). From the 1615 individuals analysed in that study, 11 individuals from Blankenberge, a coastal location situated in the northern part of the Belgian coastline (51°19'N, 3°8'E), possessed highly divergent mitochondrial COI haplotypes (called Z, Z2 and Z3). Prior to molecular analyses, each of the 1615 specimens was brought into an embryo dish containing sterile artificial seawater, which was briefly heated to 60 °C to kill the nematodes. Each nematode was transferred in a drop of sterile distilled water on a glass slide and photographed digitally under a Leica DMR microscope equipped with a Leica DC 300 camera. These pictures served as a morphological back-up. Subsequently, each nematode was preserved in an Eppendorf reaction tube of 0.5 mL filled with acetone. Morphological and molecular data were thus obtained from the same specimens.

For the present study, we additionally used specimens collected in the frame of an ongoing larger-scale phylogeographical study of *R. (P.) marina*. Nematodes with Z haplotypes were collected in South Africa (Ngazi estuary) and eastern Mexico (Playa del Carmen, Yucatan). Collection sites for all lineages are summarized in Table 1. The morphological back-up of these nematodes was created by randomly picking 5–10 adult specimens from each location and mounting them into glycerin slides according to Vincx (1996). The remaining specimens were preserved on acetone for molecular analyses. The link between morphological and molecular datasets was maintained because each location contained only one molecular lineage.

### MOLECULAR DATA

The DNA extraction protocol, PCR amplification, screening of genetic variation in the mitochondrial cytochrome oxidase c subunit 1 gene (COI) with the SSCP method and primer sequences are described in Derycke *et al.* (2005). The COI gene was amplified from 1 µL of genomic DNA, and with primers JB3 and JB5, and all samples with different SSCP band mobility patterns were sequenced with the ABI 3130XL capillary DNA sequencer. The sequencing reaction was performed with the BigDye Terminator v 3.1Mix (PE Applied Biosystems) under the following condi-

**Table 1.** Collection of specimens from each lineage. Specimens from pictures were collected in Belgium and the Netherlands (100 km), while specimens in slides were collected worldwide

| Morphological back-up              | Digital pictures |      |       |      | Glycerin slides |    |    |    |     |      |       |      |   |    |    |    |
|------------------------------------|------------------|------|-------|------|-----------------|----|----|----|-----|------|-------|------|---|----|----|----|
|                                    | PmI              | PmII | PmIII | PmIV | Z               | Z2 | Z3 | Z4 | PmI | PmII | PmIII | PmIV | Z | Z2 | Z3 | Z4 |
| Lineage                            |                  |      |       |      |                 |    |    |    |     |      |       |      |   |    |    |    |
| Location                           |                  |      |       |      |                 |    |    |    |     |      |       |      |   |    |    |    |
| Belgium – Blankenberge             |                  | X    | X     |      | X               | X  |    |    |     |      |       |      |   |    |    |    |
| Belgium – Nieuwpoort               | X                |      |       |      |                 |    |    |    |     |      |       |      |   |    |    |    |
| The Netherlands – Westerschelde    | X                | X    | X     |      |                 |    |    | X  |     |      |       |      |   |    |    |    |
| The Netherlands – Oosterschelde    | X                |      | X     |      |                 |    |    |    |     |      |       |      |   |    |    |    |
| The Netherlands – Lake Grevelingen |                  | X    |       | X    |                 |    |    |    |     |      |       | X    |   |    |    |    |
| Scotland – Westroy                 |                  |      |       |      |                 |    |    |    |     | X    |       |      |   |    |    |    |
| Boston – Woods Hole                |                  |      |       |      |                 |    |    |    |     |      | X     |      |   |    |    |    |
| Mexico – Yucatan                   |                  |      |       |      |                 |    |    |    |     |      |       |      |   |    |    |    |
| South Africa – Ngazi estuary       |                  |      |       |      |                 |    |    |    |     |      |       |      | X | X  | X  | X  |

tions: an initial denaturation of 2 min at 98 °C was followed by 40 cycles of denaturation at 98 °C for 10 s, annealing at 50 °C for 5 s and extension at 60 °C for 60 s. Both strands were sequenced using the amplification primers.

Subsequently, we created a subset of individuals ( $N = 28$ ) based on the COI topology and sequenced two nuclear loci. The highly variable ribosomal internal transcribed spacer region (ITS1, 5.8S and ITS2) was amplified as described in Derycke *et al.* (2005). The D2D3 expansion segments of the conserved 28S ribosomal DNA were amplified using primers D2A (5'-ACAAGTACCGTGAGGGAAAGTTG-3') and D3B (5'-TCCTCGGAAGGAACCAGCTACTA-3'). Amplification of this fragment started with a denaturation at 94 °C for 5 min, followed by 40 cycles of denaturation at 94 °C for 30 s, annealing at 58 °C for 30 s and extension at 72 °C for 60 s, and was terminated by a final extension period of 10 min at 72 °C. Both nuclear fragments were amplified from 1 µL genomic DNA, and both strands were sequenced with the amplification primers. New COI, ITS and D2D3 sequences have been submitted to the GenBank database (accession numbers: AM398819–AM398833 and AM399037–AM399068).

#### MORPHOLOGICAL DATA

Morphological variability in males and females containing the Z haplotypes was compared with that of the four lineages PmI, PmII, PmIII and PmIV (Fonseca *et al.*, in press) in two ways. First, a detailed investigation was performed on specimens mounted into glycerin slides. These specimens were collected worldwide (Table 1) and were measured by video capture with the Leica Q500+MC software. A total of 29 morphological characters were considered, 11 of which were shape parameters (Table 2). A detailed description of all morphological characters will appear in a forthcoming publication (Fonseca *et al.*, in press). Second, to compare the degree of morphological differentiation due to geographical variation, results from the first dataset were compared with those of measurements from specimens collected in populations from Belgium and the Netherlands. These measurements were performed on a subset of characters (those that were used in the discriminant analysis, see next section) on the digital images (Table 2).

#### DATA ANALYSES

##### Molecular data

Sequences of each locus (COI, ITS, D2D3) were aligned in ClustalX v.1.81 (Thompson *et al.*, 1997) using default parameter settings (gap opening/gap

**Table 2.** Morphometric characters and shape variables used for morphological identification of the Z lineages. Characters measured on specimens in slides and pictures are indicated with a cross

| Morphometric character                         | Abbreviation | Slides | Pictures |
|------------------------------------------------|--------------|--------|----------|
| Body length                                    | L            | X      | X        |
| Body width                                     | W            | X      | X        |
| Pharynx length                                 | Ph           | X      | X        |
| Pharynx corresponding body diameter            | Phcbd        | X      | X        |
| Position of the mid-bulb from the anterior end | Mid-bulb     | X      |          |
| Nerve ring                                     | nr           | X      | X        |
| Mid-bulb diameter                              | M bulb diam  | X      |          |
| Bulb diameter                                  | Bulb diam    | X      |          |
| Position of the anus                           | anus         | X      | X        |
| Tail length                                    | tail         | X      | X        |
| Testis length                                  | testis       | X      | X        |
| Buccal cavity length                           | bc L         | X      | X        |
| Buccal cavity width                            | bc W         | X      | X        |
| Head length                                    | head         | X      | X        |
| Spicule length                                 | spic         | X      | X        |
|                                                | Pos-intest   | X      | X        |
| Anal body diameter                             | abd          | X      | X        |
| Vulva                                          | v            | X      | X        |
| Shape parameters                               |              |        |          |
| L/W                                            | a            | X      | X        |
| L/Ph                                           | b            | X      | X        |
| L/Tail                                         | c            | X      | X        |
|                                                | c'           | X      | X        |
|                                                | spic/abd     | X      | X        |
|                                                | V%           | X      | X        |
|                                                | Pos-Int/abd  | X      | X        |
|                                                | testis/L     | X      | X        |
|                                                | nr%          | X      | X        |
|                                                | bcL/w        | X      | X        |
|                                                | BcL/head     | X      | X        |

extension costs of 15/6.66). We also amplified COI, ITS and D2D3 sequences from *R. (R.) nidrosiensis*, which was isolated from decomposing algae in the Netherlands (Derycke *et al.*, 2005), and from *R. (P.) mediterranea*, which was kindly provided by Dr Daniel Leduc from New Zealand. Deeper phylogenetic relationships between our *R. (P.) marina* sequences and sequences of *R. (R.) nidrosiensis* and *R. (P.) mediterranea* were inferred from the nuclear dataset, which was rooted with sequences from the nematodes *Ancylostoma caninum* (D2D3: AM039739; ITS: DQ438079) and *Necator americanus* (D2D3: AM039740; ITS: AF217891) obtained from GenBank. Both species belong to the same order (Rhabditida) as *R. (P.) marina*.

An unambiguous alignment was obtained from the COI sequences, while indels were observed in both nuclear loci, especially for the ITS region. Hence, each of the two nuclear alignments was checked for unreliable positions in SOAP 1.2.a4 (Löytynoja & Milinko-

vitch, 2001), using the following Clustalw parameter range: gap penalties were allowed to range between 11 and 19 with a two-step increase, and extension penalties ranged between 3 and 11, also with a two-step increase. We used a threshold level of 90% for the D2D3 locus, which resulted in the removal of 17 unreliable positions. The threshold level for the ITS alignment was created as follows: first, we removed the outgroup sequences *N. americanus* and *A. caninum*. At the 90% level, 713 out of 913 sites appeared unreliable. However, manual inspection of the alignment showed that many of these 'unreliable sites' did not contain much variation among sequences. Therefore, we lowered the threshold level until all indel events remained excluded. This was at the 60% level. Second, we also excluded *R. (R.) nidrosiensis* from the dataset, which resulted in the exclusion of 'only' 277 out of 903 positions at the 90% level. Hence, the alignment of ITS sequences within *Pellioiditis* was highly reliable at the 90% level, and the threshold for



the ITS alignment including *N. americanus*, *A. caninum* and *R. nidrosiensis* was set at 60%.

Prior to phylogenetic analysis, the appropriate model of evolution for each locus was determined with Modeltest 3.7 (Posada & Crandall, 1998) using the Akaike Information Criterion (AIC) (Posada & Buckley, 2004). For each dataset, the overall transition/transversion ratio was calculated using the values from Modeltest. The COI dataset was screened for saturation at first, second and third codon positions by calculating the uncorrected pairwise distances and corrected maximum-likelihood distances for each codon position in Paup. A linear relationship between both distances indicates that no saturation has occurred. Phylogenetic relationships were calculated for each locus separately according to three methods: most-parsimonious (MP) and maximum-likelihood (ML) trees were calculated in Paup 4.0 beta 10 (Swofford, 1998) using heuristic searches and a tree-bisection-reconnection branch swapping algorithm (10 000 rearrangements), and a random stepwise addition of sequences in 100 replicate trials. One tree was held at each step. Robustness of the obtained trees was tested by bootstrapping with 1000 replications for MP and 100 replications for ML and ten replicate trials of sequence addition. Gaps were treated as missing data. In addition, a Bayesian analysis (BA) was performed in Mr Bayes v.3.1.2 (Huelsenbeck & Ronquist, 2005). Four independent Markov chains were run for 500 000 generations and a tree was saved every tenth generation. The first 10 000 trees were discarded as burn-in. The best model for Bayesian analysis of the three loci was determined with MrModeltest 2.2 (Nylander, 2004) using the AIC.

We subsequently performed an incongruence length difference (ILD) test (Mickey & Farris, 1981) in Paup, to investigate whether the different gene fragments could be combined in one analysis.

#### Morphological data

Morphological differences among the molecular lineages were analysed using backward stepwise discriminant function analyses (DFA) in Statistica 6.0 (StatSoft, 2001). DFA determines which variables are best to discriminate between a priori defined groups. In our study, we defined eight groups based on the molecular COI data (PmI, PmII, PmIII, PmIV, Z, Z2, Z3 and Z4). We only had one specimen for Z3, and hence it was removed from the dataset. Variables which were correlated with each other above the 0.8 level were omitted. This threshold was determined after calculation of the correlation between variables that are expected to be correlated (e.g. length and width, length and tail length, tail and anal body diameter). Morphological characters for which means

and variances were correlated were log transformed (body length and body length/body width in females; body length, body length/pharynx length and position of the nerve ring in males). Missing data were replaced by the average value in a particular lineage.

As specimens from the different localities were preserved by different methods (pictures or permanent slides), morphological data from each method were analysed and interpreted separately. A first DFA analysis involved all specimens (females and males,  $N = 46$  and  $N = 26$ , respectively) from the seven lineages which had been prepared in slides (Table 1). This yielded morphological information obtained from a vast geographical scale (Europe, Africa, USA). Subsequently, females and males were analysed separately so that sexually dimorphic and gender-specific variables could be included in the DFA. We performed a third DFA, which involved six lineages from a fairly small geographical area (c. 100 km) in Belgium and the Netherlands that had been photographed digitally (Table 1). Lineage Z4 has not been observed in Belgium and the Netherlands, and hence this lineage was not included in this last analysis. In addition, no males from Z and Z2 from Belgium and the Netherlands were available, so this last DFA was restricted to females.

No single morphometric character could unambiguously separate the species. Therefore, we created a polytomous key in which species are identified graphically by a combination of characters. Characters are chosen in accordance with the number of different frequency peaks found in their distribution range. The best characters to use at each step of the key have the highest number of peaks (= the highest variation) (Fonseca, Vanreusel & Decraemer, 2006).

## RESULTS

#### MOLECULAR DATA: PHYLOGENETIC ANALYSIS OF COI

The three methods of phylogenetic inference (MP, ML, BA) showed highly concordant tree topologies and divided the 58 mt COI sequences of *R. (P.) marina* into seven lineages and one terminal branch (Fig. 1). The only difference between MP, ML and BA was the inclusion of the Z2 haplotypes within the PmII lineage in BA, which explains the low bootstrap support of the PmII lineage (Fig. 1). Within lineages, little or no substructure was observed. All Z haplotypes were pooled into three distinct lineages (Z, Z2, Z4) and one terminal branch (Z3) with high bootstrap support and which were highly divergent from the known cryptic lineages PmI, PmII, PmIII and PmIV (Table 3). The positioning of the sister species *R. (P.) mediterranea* remained unresolved, as were the deeper phylogenetic nodes. The clade containing *R.*

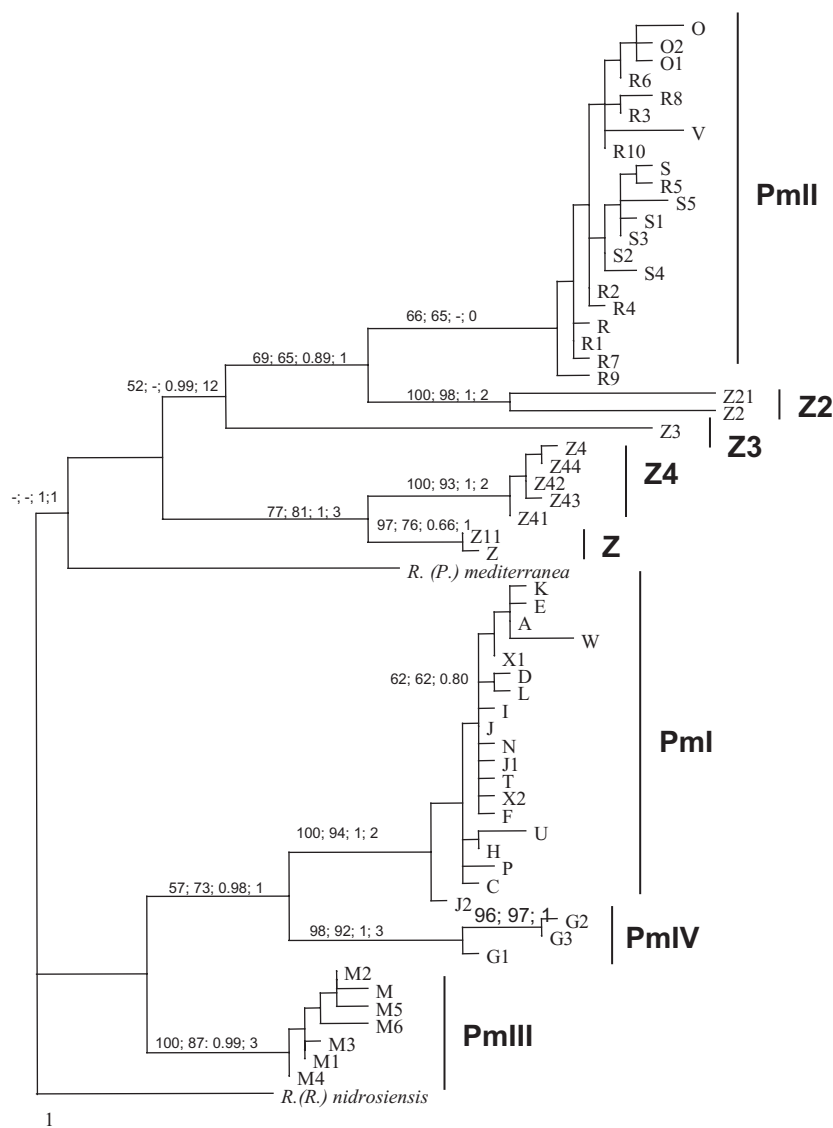

**Figure 1.** One of the 46 most parsimonious trees based on 396 bp of the mitochondrial COI gene. Values above branches are bootstrap supports from MP, ML, posterior probability values of BA and the number of fixed differences for each branch. Only bootstrap values above 50 are indicated. Lineages are indicated next to each branch. A dash indicates the absence of a branch in the respective analysis.

(*P.*) *mediterranea*, PmII, Z, Z2, Z3 and Z4, contained one amino acid substitution (valine changed to leucine). Calculations of the transition/transversion ratio indicated that transitions vastly outnumbered transversions (Table 4). Plotting the uncorrected pairwise distances against the ML distances for each codon position separately indicated that saturation occurred at the third codon position of the COI gene (data not shown). The number of fixed differences for each lineage is indicated above branches (Fig. 1). Only the PmII lineage did not contain any fixed differences. Divergence ranges were lower within

lineages (0.2–2.3%) than between lineages (3.5–10.6%) (Table 3).

#### MOLECULAR DATA: PHYLOGENETIC ANALYSES OF THE NUCLEAR ITS and D2D3 REGIONS

MP, ML and BA of both nuclear genes were highly concordant and the ILD test allowed us to combine them into one dataset ( $P = 1$ , Fig. 2). The nuclear tree generally gave the same topology as the mitochondrial COI gene, the only difference being caused by the inclusion of the Z specimen within the Z4 lineage

**Table 3.** Sequence divergence among the molecular lineages in *R. (P.) marina*, and among *R. (P.) mediterranea* and *R. (R.) nidrosiensis*. Below diagonal are divergences based on COI, above diagonal based on ITS. Values on the diagonal are intralineage divergence for the COI gene

|                             | PmI      | PmII     | PmIII     | PmIV    | Z         | Z2        | Z3        | Z4        | <i>R. (P.) mediterranea</i> | <i>R. (R.) nidrosiensis</i> |
|-----------------------------|----------|----------|-----------|---------|-----------|-----------|-----------|-----------|-----------------------------|-----------------------------|
| PmI                         | 0.2–1.7  |          |           |         |           |           |           |           |                             |                             |
| PmII                        | 7.3–10.3 | 5–5.7    |           |         |           |           |           |           |                             |                             |
| PmIII                       | 6.8–8.3  | 0.2–2.3  | 13.8–14.9 |         |           |           |           |           |                             |                             |
| PmIV                        | 5.3–7.1  | 7.8–10.3 | 14.8–15.2 | 0.2–1.3 |           |           |           |           |                             |                             |
| Z                           | 8.8–10.6 | 7.8–9.6  | 6.6–7.3   | 0.2–1.3 | 15.0–15.1 |           |           |           |                             |                             |
| Z2                          | 9.3–9.8  | 6.3–8.1  | 6.6–7.1   | 7.8–8.3 | 0.2       | 4.4       |           |           |                             |                             |
| Z3                          | 8.8–9.6  | 4.1–5.5  | 8.5–9.1   | 9.1–9.3 | 7.3       | 1.3–1.8   | 5.1–5.2   |           |                             |                             |
| Z4                          | 8.5–9.6  | 6.3–8.5  | 8.8–9.8   | 9.3–9.6 | 8.1–8.3   | 14.6–14.8 | 3.1–3.7   | 14.4–14.6 |                             |                             |
| <i>R. (P.) mediterranea</i> | 9.3–10.6 | 6.6–8.5  | 6.8–7.8   | 8.8–9.6 | 3.5–4.3   | 4.4–4.7   | 14.7–14.9 | 14.8–15.4 | 11.8–12.0                   |                             |
| <i>R. (R.) nidrosiensis</i> | 7.3–8.5  | 7.5–9.1  | 7.1–7.8   | 9.1–9.6 | 6.3–6.5   | 15.5      | 5.2–5.6   | 12.9–13.8 | 12.3–12.7                   | 24.1–24.2                   |
|                             |          | 7.5–9.6  | 7.5–8.1   | 8.3–8.5 | 8.8–9.1   | 0.4       | 15.8      | 14.8–15.1 | 10.1–10.6                   | 23.4–23.6                   |
|                             |          |          |           |         |           |           | 2.7       | 5.0–5.2   | 11.9–12.2                   | 23.9–24.2                   |
|                             |          |          |           |         |           |           |           | 14.8–14.9 | 11.3                        | 24.0–24.1                   |
|                             |          |          |           |         |           |           |           | 15.2–15.6 | 11.8                        | 24.9                        |
|                             |          |          |           |         |           |           |           | 0.2–0.4   | 12.2                        | 23.4                        |
|                             |          |          |           |         |           |           |           | 8.3–8.5   | 10.8                        | 23.5                        |
|                             |          |          |           |         |           |           |           | 7.8–8.1   | –                           | 24.2–24.3                   |
|                             |          |          |           |         |           |           |           |           | 8.8                         | 24.6                        |
|                             |          |          |           |         |           |           |           |           |                             | –                           |

in the nuclear dataset, while it was a strongly supported monophyletic lineage in the COI dataset. Divergences between Z and Z4 were relatively low (Table 3, and 0–0.4% in D2D3). Removing the Z specimen from the dataset yielded a non-significant ILD test between the mt and nuclear datasets ( $P = 0.28$ ). The deeper nodes in the tree were well resolved in the nuclear tree, which supported the monophyly of the subgenus *Pellioditis*. Within the 29 *Pellioditis* sequences, the PmI, PmII, PmIII and PmIV lineages are again clearly separated and well supported (bootstrap > 90), except for lineage PmIV. The Z4 haplotypes are more closely related to the PmIII lineage and to *R. (P.) mediterranea* than to the other *R. (P.) marina* lineages. In addition, Z2 and Z3 form a monophyletic clade with the PmII lineage. They are, however, as divergent from each other as they are from the other lineages within the *Pellioditis* group (Table 3). Finally, the PmI and PmIV lineages are considered sister taxa.

#### MORPHOLOGICAL ANALYSES

The DFA carried out on the complete dataset from slides (females + males) without sexually dimorphic (body length/body width) and gender-specific characters (spicule length, position of the vulva) separated most lineages in the first two roots (Fig. 3). Root 1 was best explained by body length and separated three clusters: Z–Z2–PmIII, Z4–PmII and PmI–PmIV. Each lineage within these clusters was separated along root 2, except for lineages PmII–Z4 and Z–Z2. All interlineage squared Mahalanobis distances ( $D^2$  values) were significantly different from zero ( $P < 0.01$  for all pairwise comparisons) except for lineages Z–Z2 ( $P = 0.05$ ).  $D^2$  values ranged between 2.1 (Z–Z2) and 30.3 (PmIII–IV). When sexually dimorphic and gender-specific characters were included in the DFA, the canonical biplot of females separated lineages Z and Z2 from each other and from all other lineages along the first root (Fig. 4A). Z4 specimens clustered again with PmII, and  $D^2$  values between PmII–Z4, PmII–PmI and PmII–PmIV were non-significant at the  $P < 0.05$  level ( $D^2 = 24.9$ ,  $P = 0.14$ ;  $D^2 = 26.9$ ,  $P = 0.15$ ;  $D^2 = 30.3$ ,  $P = 0.08$ , respectively). However, this result should be interpreted with caution, as only two specimens of lineage PmII were available. All other  $D^2$  values were highly significant ( $P < 0.001$ , except for PmI–PmIV where  $P = 0.03$  and for PmII–Z2 where  $P = 0.009$ ) and ranged between 13.1 and 191.5. Based on measurements in males, all lineages were clearly separated in the first two roots of the canonical biplot (data not shown).  $D^2$  values were high among all lineages and ranged between 45.3 and 721.5. They were non-significant only between Z–Z4 and Z–PmIII ( $P = 0.3$  and  $P = 0.1$ , respectively).

**Table 4.** Summary of phylogenetic analyses for each gene separately and for the combined ITS–D2D3 dataset. Sequences of *Necator americanus* and *Ancylostoma caninum* are not considered in these calculations. Percentages indicate the threshold level used in SOAP for the ITS data

|                                    | COI       | ITS      |           | D2D3    | ITS–D2D3  |
|------------------------------------|-----------|----------|-----------|---------|-----------|
|                                    |           | 90%      | 60%       |         |           |
| No. of taxa                        | 62        | 32       | 32        | 33      | 30        |
| Sequence length                    | 396       | 669–858  | 669–858   | 579–589 | 1248–1603 |
| Alignment length                   | 396       | 913      | 913       | 597     | 1646      |
| No. of unreliable positions        | 0         | 707      | 395       | 24      | 418       |
| No. of parsimony-informative sites | 76 (19%)  | 24 (12%) | 121 (23%) | 41 (7%) | 162 (13%) |
| Substitution model                 | K81uf+I+G | SYM+G    | GTR+G     | GTR+I+G | GTR+I+G   |
| Tree length                        | 247       | 77       | 297       | 156     | 455       |
| No. of trees                       | 46        | 15       | 3         | 3       | 4         |
| Ts/Tv                              | 2.5       | 1.34     | 1.92      | 3.17    | 2.24      |

However, this is most probably due to the small number of males ( $N = 2$ ) analysed in these lineages.

Finally, we compared female morphometric data from pictures to infer variation in the observed morphological differentiation between lineages on a smaller geographical scale (100 km). For this analysis, we only considered populations between which gene flow was known to occur from a previous population genetic study (Derycke *et al.*, 2006). The canonical biplot clearly separated lineages PmI, PmII and PmIII, while lineage Z clustered with lineage PmIII ( $D^2 = 15.4$ ,  $P = 0.27$ ) and lineage Z2 clustered with lineage PmII ( $D^2 = 11.5$ ,  $P = 0.52$ ; Fig. 4B).

We subsequently compared our morphometric data with data from the literature on rhabditid nematodes that have been observed on decomposing seaweeds (see Appendix 1). For *R. (R.) nidrosiensis*, morphometric data were available from several specimens, while we had minimum and maximum values for *R. (P.) marina*, *R. (P.) mediterranea*, *R. (P.) littorea* Sudhaus & Nimrich 1989 and *R. (P.) obesa* Gagarin 2001. The graphical polytomous key based on a combination of five characters (body length, tail length, buccal cavity length, body length/tail length and spicule length) unambiguously separated several species depending on the gender analysed (Fig. 5). For females, six species were clearly differentiated. The separation of PmII and *R. (P.) mediterranea* was less obvious, but in general PmII specimens had a larger body length and a longer tail. Differences between the PmIII and Z4 specimens were absent in the first two steps of the key, but clear differences in buccal cavity width were observed (minimum – maximum values of 3–5  $\mu\text{m}$  vs. 5–7  $\mu\text{m}$  for PmIII and Z4, respectively). In addition, females of PmIII had a sharp conical tail, while females of Z4 had a rounded tail tip (data not shown). For males, seven species could be differentiated with

the first two steps of the key (Fig. 5C, D). We have no data on the buccal cavity length of *R. (R.) nidrosiensis* and *R. (P.) obesa*, and consequently both species are absent in Figure 5D. Spicule length separated the remaining species, except for one outlier specimen of Z4 and *R. (P.) mediterranea* (Fig. 5E). Males from the latter species are distinguishable from Z2 and Z4 (and from the other lineages) by the absence of a structured bursa.

DISCUSSION

MOLECULAR RESULTS

The phylogenetic analyses of three molecular loci (COI, ITS, D2D3) show highly concordant tree topologies with respect to the subdivision of *R. (P.) marina* individuals into several deeply divergent lineages. The few inconsistencies between the mitochondrial and the nuclear dataset are caused either by saturation effects (Dolphin *et al.*, 2000) or by conflicting phylogenetic signals in both datasets (Sanderson & Shaffer, 2002). Saturation (multiple substitutions at the same sites) masks the true levels of sequence divergence and obscures the deeper phylogenetic relationships among sequences (Arbogast *et al.*, 2002). Several observations do in fact indicate that saturation is present in our mt COI data: (1) the inability of the COI dataset to infer deeper phylogenetic nodes, (2) the high number of transitions with respect to transversions at the third codon position, (3) the high bootstrap support situated only at the tips of the branches and (4) the differences between MP and ML bootstrap values (Page *et al.*, 2005). In the present study, the principal cause of the conflicts between the nuclear and mitochondrial dataset are most probably differences in phylogenetic signal: after identifying



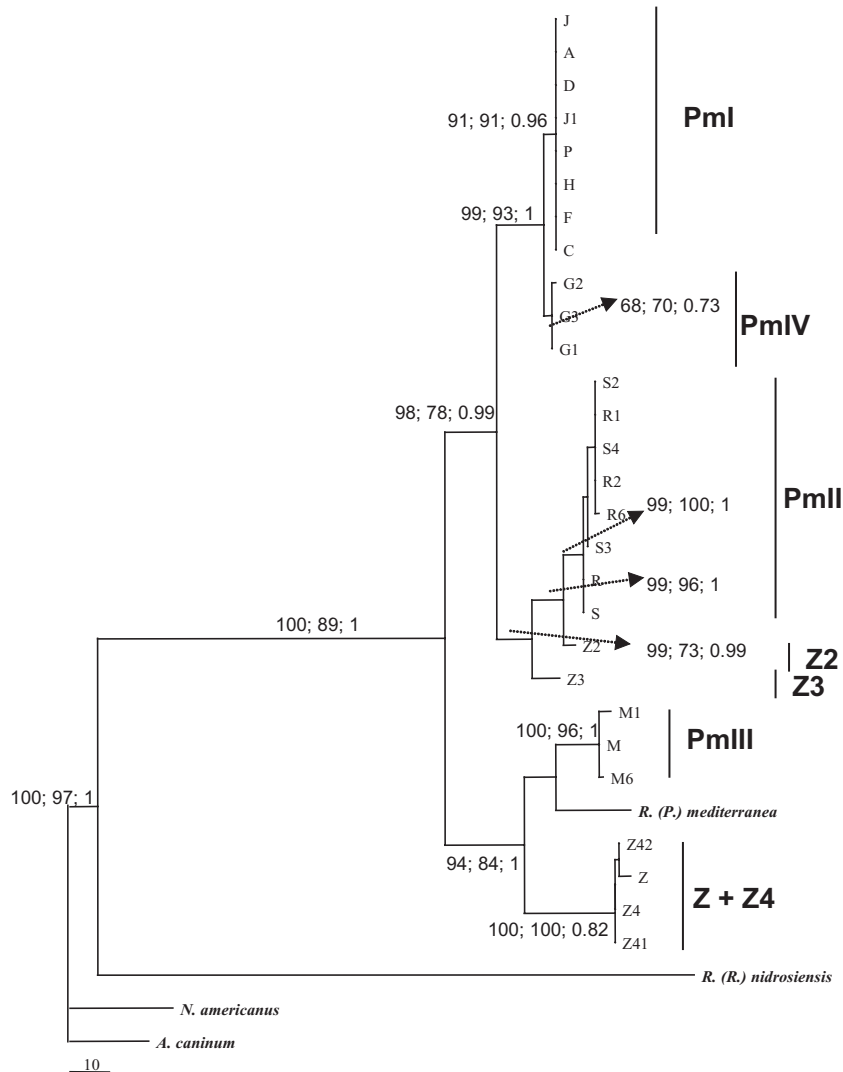

**Figure 2.** One of the seven most parsimonious trees of the combined nuclear ITS and D2D3 expansion segments. Values above branches (or indicated by arrow) are bootstrap support from MP, ML and posterior probability values from BA. Only bootstrap values above 50 are indicated. Lineages are indicated next to each branch.

the conflicting partition (the COI gene) and the problematic taxa (Z haplotype) by the 'conditional combinability' method (Bull *et al.*, 1993), a separate analysis of mitochondrial and nuclear fragments appeared the best approach for our data. In this way, we could infer recent phylogenetic relationships with inclusion of all taxa from the mtDNA, while the deeper nodes in the tree were resolved in the nuclear dataset.

Each lineage contains 2–17 fixed differences, this number differing between gene fragments. The COI gene is generally assumed to reach fixation four times more rapidly than its nuclear counterparts, because of its maternal inheritance and haploid state (Nadler, 2002), which in turn reduce the effective population size of mitochondrial genes. From Table 5 it is clear that in most cases the number of fixed differences per

100 bases is 1–6 times higher in the mt COI, although this is not true for all lineages. Clearly, this number is strongly dependent on the number of individuals analysed in each lineage and further demonstrates the shortcomings of species delimitation based solely on fixed differences (Wiens & Servedio, 2000). Sequence divergence is less susceptible to the number of specimens analysed, but seems too variable across taxa to be a good universal predictor for species delimitation (Ferguson, 2002; Cognato, 2006). Within the species complex investigated here, the lineages of *R. (P.) marina* are as divergent from each other as they are from their close relatives *R. (P.) mediterranea* and *R. (R.) nidrosiensis*. Divergent molecular lineages are not compatible with species if (1) extremely high rates of evolution are present in both

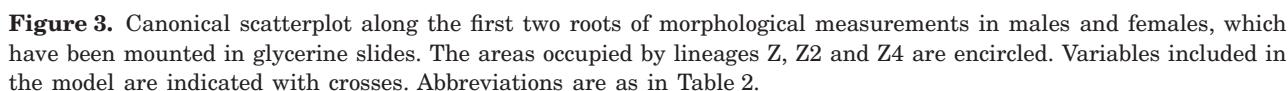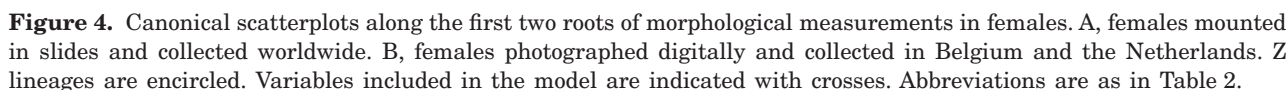

consider it unlikely that highly divergent polymorphisms in two independently evolving genomes would be maintained in the population. Balancing selection in the mitochondrial DNA genome in invertebrates has been associated with sex determination (Quesada, Wenne & Skibinski, 1999), but this is unlikely here as relative frequencies of some lineages

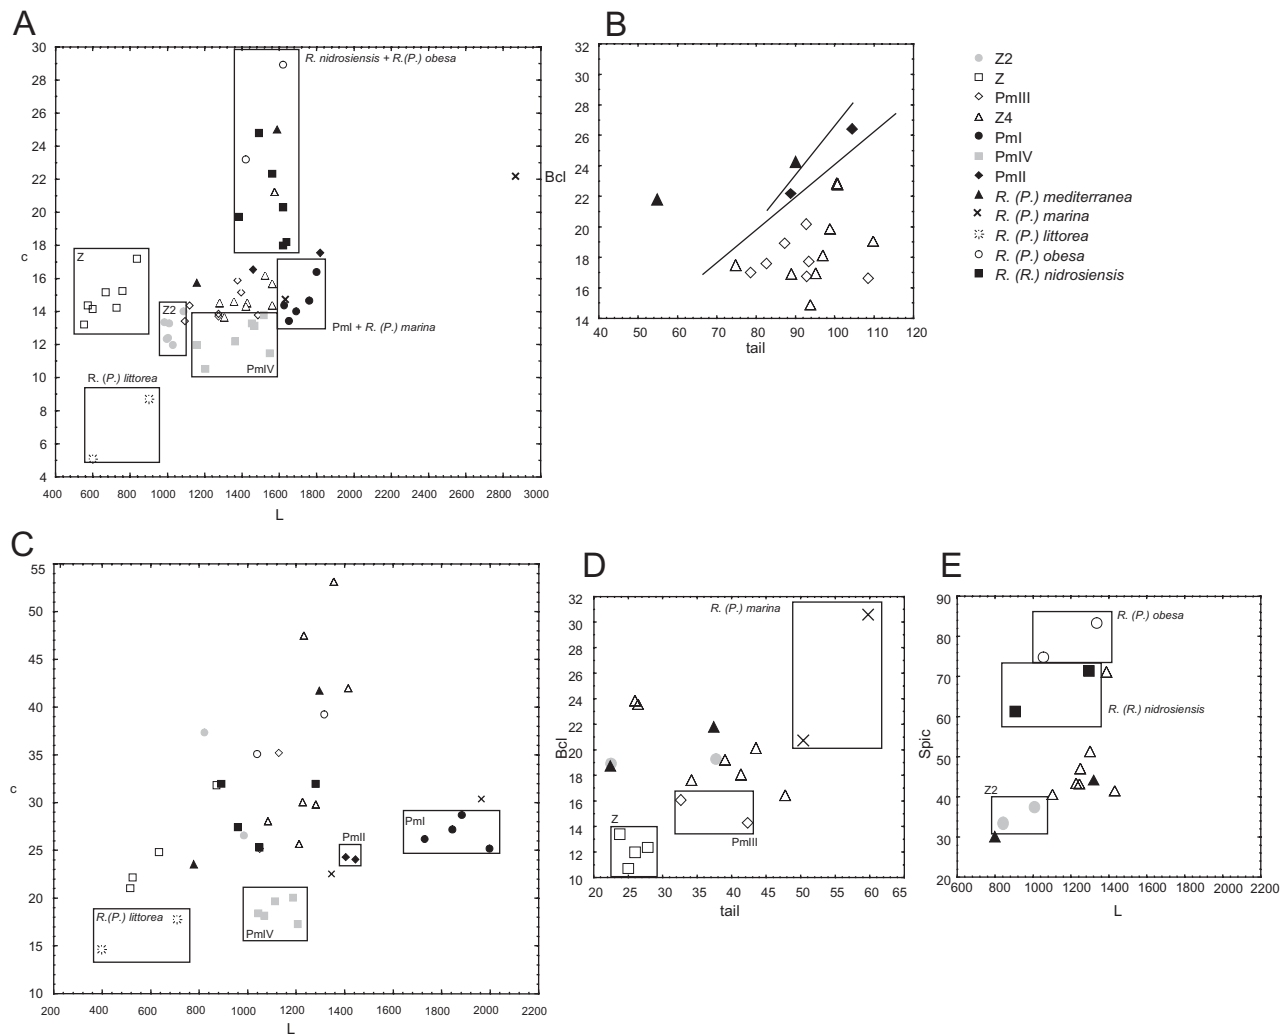

**Figure 5.** Graphical polytomous key for identification of species within the *R. (P.) marina* species complex. A, females from all species, body length vs. body length/tail length; B, females from the clustered species in A, tail length vs. buccal cavity length; C, males from all species, body length vs. body length/tail length; D, males from the clustered species in C, tail length vs. buccal cavity length; E, males from the clustered species in D, body length vs. spicule length.

**Table 5.** Number of fixed differences in COI, ITS and D2D3 genes per 100 bp, for each lineage

|       | COI  | ITS  | D2D3 |
|-------|------|------|------|
| PmI   | 0.51 | 0.76 | 0.00 |
| PmII  | 0.00 | 0.38 | 0.00 |
| PmIII | 0.76 | 1.26 | 0.34 |
| PmIV  | 0.76 | 0.13 | 0.00 |
| Z     | 0.25 | 0.25 | 0.00 |
| Z2    | 0.51 | 0.00 | 0.34 |
| Z3    | 3.03 | 0.50 | 0.17 |
| Z4    | 0.51 | 0.00 | 0.00 |
| Total | 6.31 | 3.28 | 0.84 |

are not equally distributed across geographical regions (e.g. PmIV in Lake Grevelingen, Z4 in Mexico) (Rocha-Olivares *et al.*, 2001). Finally, if the deeply divergent lineages are to be explained by vicariant events, they would be expected to be capable of reproduction once they occur in sympatry. By contrast, deeply diverged mitochondrial lineages may be maintained in the absence of any obvious reproductive barrier (Crochet *et al.*, 2003; Jouventin, Cuthbert & Ottvall, 2006). However, the monophyletic status of (nearly) all lineages in the nuclear gene trees provides additional evidence for reproductive isolation. This monophyly is obviously disputable for lineages Z and Z4 and may therefore be suggestive of ongoing gene flow between both taxa, as observed in large white-headed gulls (Crochet *et al.*, 2003). In view of

the allopatry of Z and Z4, however, it is more likely that speciation between both lineages has occurred too recently to be detected in the nuclear genes.

#### MORPHOLOGICAL RESULTS

The set of morphological variables used in this study clearly demonstrates that the three Z lineages exhibit morphological differences with respect to each other and to the previously described lineages within *R. (P.) marina*. Regardless of which morphological variables are responsible for this differentiation, it shows that molecular lineages in free-living nematodes can be morphologically quite distinct. Similar observations have been made on parasitic nematodes (e.g. Carneiro, Castagnone-Sereno & Dickson, 1998; Han *et al.*, 2006). Although different methodologies were applied to obtain morphological data, our analyses strongly suggest that the morphological variation is affected by geographical scale, as the differences between some lineages were less pronounced or even disappeared when only specimens from geographically close populations were considered. Environmental selection may therefore hamper morphological differentiation of nematode (sibling) species. Similar effects of geography on morphology in parasitic nematodes have been reported (Agudelo *et al.*, 2005; Nguyen *et al.*, 2006), thereby illustrating the problem of morphological variability in nematodes.

Comparing our measurements with those of *R. (P.) marina* reported in Sudhaus (1974) and of the congeners *R. (P.) mediterranea*, *R. (P.) ehrenbaumi*, *R. (P.) obesa* and *R. (P.) littorea* reported in the literature (Inglis & Coles, 1961; Sudhaus, 1974; Gagarin, 2001; Sudhaus & Nimrich, 1989; Appendix 1) shows that our specimens are more similar to *R. (P.) marina* and *R. (P.) mediterranea* than to the other congeners. Moreover, the graphical polytomous key indicates that the combination of four morphometric characters (body length, tail length, buccal cavity length, spicule length) and one shape parameter (body length/tail length) is sufficient to differentiate all species. The three Z lineages show some similarities to, but clearly also differences from, the *R. (P.) marina* and *R. (P.) mediterranea* described by Sudhaus (1974). *R. (P.) mediterranea* was initially described as a geographical variation of *R. (P.) marina*, from which it differed in having a smaller body length, an unstructured bursa and a sharp conical female tail (Sudhaus, 1974). Although body length and tail shape can be substantially influenced by environmental conditions, *R. (P.) mediterranea* was later raised to species level (Andrassy, 1983; Sudhaus & Nimrich, 1989). The high levels of divergence between *R. (P.) mediterranea* and *R. (P.) marina* lineages in both mitochondrial and nuclear fragments support this view.

#### COMBINING MOLECULAR AND MORPHOLOGICAL RESULTS TO INFER TAXONOMIC STATUS OF THE 'CRYPTIC' LINEAGES WITHIN *R. (P.) MARINA*

Inferring species status of the Z haplotypes requires a solid framework from which we can conclude whether the observed differences are situated at the intra- or interspecific level. For nematodes, evolutionary approaches are very promising for delimiting species as they produce phylogenetic relationships based on many characters (Adams, 1998, 2001). Nevertheless, phylogenetic analyses of DNA sequences can easily lead to misinterpretations of the evolutionary processes underlying the observed patterns (Arbogast *et al.*, 2002; Nadler, 2002). These theoretical drawbacks are substantially reduced when several independently evolving molecular markers are analysed in the same set of individuals (Nadler, 2002). We used concordant patterns among different markers as evidence for independent evolutionary histories of the four Z-lineages. The analyses of one mitochondrial and two nuclear genes yielded highly concordant tree topologies, indicating that the highly divergent phylogenetic lineages are caused by a common evolutionary process, i.e. speciation. Furthermore, at least three of the four lineages are accompanied by morphological differences. Although morphology may be influenced by geography, each of the lineages is differentiated from each other and from *R. (P.) marina* and *R. (P.) mediterranea* by a combination of morphometric characters and morphological observations (Fig. 5). For example, lineages Z and Z4, which had similar nuclear gene sequences, are morphologically quite distinct. This clearly illustrates the usefulness of combining molecular and morphological data to delineate species. Furthermore, lineages Z and PmIII have been observed in very distant geographical populations (Belgium and Africa, Belgium and Boston, respectively, S. Derycke *et al.*, unpublished data), despite presumably limited dispersal of nematodes. This wide geographical distribution suggests that *R. (P.) marina* dispersal is not that limited at all or, alternatively, that parallel evolution may be acting in the *R. (P.) marina* complex.

#### CONCLUSION

Based on molecular and morphological data, we have identified eight species within the 'morphospecies' *R. (P.) marina*, of which four are new. We here refer to these species as Z, Z2, Z3 and Z4. Although nuclear sequences from Z were very similar to those of Z4, specimens belonging to both lineages were morphologically quite distinct. Our molecular data also confirm the species status of *R. (P.) mediterranea*. Although rhabditid nematodes are a primarily terrestrial group



and may be more susceptible to cryptic diversity due to the generally high morphological similarity among species, our results suggest that biodiversity in free-living marine nematodes may be substantially underestimated. This study further illustrates the usefulness of a holistic approach for identifying species in problematic taxa. Obviously, more species are likely to be present within the *R. (P.) marina* species complex, due to its cosmopolitan distribution.

## ACKNOWLEDGEMENTS

S.D. acknowledges a grant from the Flemish Institute for the Promotion of Scientific-Technological Research (I.W.T.). G.F. is supported by the Brazilian ministry of science and technology (CNPq). T.M. is a postdoctoral fellow with the Flemish Fund for Scientific Research. Further financial support was obtained from Ghent University in BOF – projects 01GZ0705 and 011060002. We are grateful to the following people for their help in collecting and retrieving samples of *R. (P.) marina*: Prof. Dr G. Borgonie, Drs S. Vandendriessche, G. Van Hoey and K. Houthoofd, Ms H. Wydaeghe and Mr T. Volant.

## REFERENCES

- Adams BJ. 1998.** Species concepts and the evolutionary paradigm in modern nematology. *Journal of Nematology* **30**: 1–21.
- Adams BJ. 2001.** The species delimitation uncertainty principle. *Journal of Nematology* **33**: 153–160.
- Agudelo P, Robbins RT, Stewart JM, Szalanski AL. 2005.** Intraspecific variability of *Rotylenchulus reniformes* from cotton-growing regions in the United States. *Journal of Nematology* **37**: 105–114.
- Andrassy I. 1983.** *A taxonomic review of the suborder Rhabditina (Nematoda: Secernentea)*. Paris: Office de la Recherche Scientifique et Technique Outre-Mer.
- Arbogast BS, Edwards SV, Wakeley J, Beerli P, Slowinski JB. 2002.** Estimating divergence times from molecular data on phylogenetic and population genetic timescales. *Annual Review of Ecology and Systematics* **33**: 707–740.
- Avice JC. 1995.** Mitochondrial DNA polymorphism and a connection between genetics and demography of relevance to conservation. *Conservation Biology* **9**: 686–690.
- Bakker J, Bouwman-Smits L. 1988.** Contrasting rates of protein and morphological evolution in cyst nematode species. *Phytopathology* **78**: 900–904.
- Bhadury P, Austen MC, Bilton DT, Lamshead PJD, Rogers A, Smerdon GR. 2006.** Development and evaluation of a DNA-barcoding approach for the rapid identification of nematodes. *Marine Ecology Progress Series* **320**: 1–9.
- Blaxter M, Mann J, Chapman T, Thomas F, Whitton C, Floyd R, Abebe E. 2005.** Defining operational taxonomic units using DNA barcode data. *Philosophical Transactions of the Royal Society of London. Series B* **360**: 1935–1943.
- Bull JJ, Huelsenbeck JP, Cunningham CW, Swofford DL, Waddell PJ. 1993.** Partitioning and combining data in phylogenetic analysis. *Systematics Biology* **42**: 384–397.
- Butler MH, Wall SM, Luehrsen KR, Fox GE, Hecht RM. 1981.** Molecular relationships between closely related strains and species of nematodes. *Journal of Molecular Evolution* **18**: 18–23.
- Carneiro RMDG, Castagnone-Sereno P, Dickson DW. 1998.** Variability among four populations of *Meloidogyne javanica* from Brazil. *Fundamental and Applied Nematology* **21**: 319–326.
- Cognato AI. 2006.** Standard percent DNA sequence difference for insects does not predict species boundaries. *Journal of Economic Entomology* **99**: 1037–1045.
- Coomans A. 2002.** Present status and future of nematode systematics. *Nematology* **4**: 573–582.
- Crochet PA, Chen JZ, Pons JM, Lebreton JD, Hebert PDN, Bonhomme F. 2003.** Genetic differentiation at nuclear and mitochondrial loci among large white-headed gulls: sex-biased interspecific gene flow? *Evolution* **57**: 2865–2878.
- De Ley P, Félix M-A, Frisse LM, Nadler SA, Sternberg PW, Thomas WK. 1999.** Molecular and morphological characterisation of two reproductively isolated species with mirror-image anatomy (Nematoda: Cephalobidae). *Nematology* **1**: 591–612.
- Derycke S, Backeljau T, Vlaeminck C, Vierstraete A, Vanfleteren J, Vincx M, Moens T. 2006.** Seasonal dynamics of population genetic structure in cryptic taxa of the *Pellioiditis marina* complex (Nematoda: Rhabditidae). *Genetica* **128**: 307–321.
- Derycke S, Remerie T, Vierstraete A, Backeljau T, Vanfleteren J, Vincx M, Moens T. 2005.** Mitochondrial DNA variation and cryptic speciation within the free-living marine nematode *Pellioiditis marina*. *Marine Ecology Progress Series* **300**: 91–103.
- Dolphin K, Belshaw R, Orme CDL, Quicke DLJ. 2000.** Noise and incongruence: interpreting results of the incongruence length difference test. *Molecular Phylogenetics and Evolution* **17**: 401–406.
- Ferguson JWH. 2002.** On the use of genetic divergence for identifying species. *Biological Journal of the Linnean Society* **75**: 509–516.
- Floyd R, Abebe E, Papert A, Blaxter M. 2002.** Molecular barcodes for soil nematode identification. *Molecular Ecology* **11**: 839–850.
- Fonseca G, Derycke S, Moens T. in press.** Integrative taxonomy in two free-living nematode species complexes. *Biological Journal of the Linnean Society*, in press.
- Fonseca G, Vanreusel A, Decraemer W. 2006.** Taxonomy and biogeography of *Molgolaimus* Ditlevsen, 1921 (Nematoda: Chromadoria) with reference to the origins of deep sea nematodes. *Antarctic Science* **18**: 23–50.
- Gagarin VG. 2001.** A new species of nematodes found in rotting seaweed on the shore of the Black Sea. *Russian Journal of Marine Biology* **27**: 259–261.
- Han HR, Jeyaprakash A, Weingartner DP, Dickson DW. 2006.** Morphological and molecular biological characteriza-

- tion of *Belonolaimus longicaudatus*. *Nematropica* **36**: 37–52.
- Hebert PDN, Ratnasingham S, deWaard JR. 2003.** Barcoding animal life: cytochrome c oxidase subunit I divergences among closely related species. *Proceedings of the Royal Society of London series B (suppl)* **270**: 96–99.
- Huelsenbeck JP, Ronquist F. 2005.** Mr Bayes v 3.1.2, *Bayesian analysis of phylogeny*. University of California.
- Inglis WG, Coles JW. 1961.** The species of *Rhabditis* (Nematoda) found in rotting seaweed on British beaches. Bulletin of the British Museum (Natural History). *Zoology* **7**: 320–333.
- Jouventin P, Cuthbert RJ, Ottvall R. 2006.** Genetic isolation and divergence in sexual traits: evidence for the northern rockhopper penguin *Eudyptes moseleyi* being a sibling species. *Molecular Ecology* **15**: 3413–3423.
- Lamshead PJD. 2001.** Marine nematode diversity. In: Chen ZX, Chen SY, Dickson DW, eds. *Nematology, advances and perspectives*. San Francisco, CA: ACSE-TUP Book Series, 436–467.
- Löytynoja A, Milinkovitch MC. 2001.** SOAP, cleaning multiple alignments from unstable blocks. *Bioinformatics* **17**: 573–574.
- Mickevich ME, Farris JS. 1981.** The implications of congruence in Menidia. *Systematic Zoology* **27**: 143–158.
- Nadler SA. 2002.** Species delimitation and nematode biodiversity: phylogenies rule. *Nematology* **4**: 615–625.
- Nguyen KB, Gozel U, Koppenhofer HS, Adams BJ. 2006.** *Heterorhabditis floridensis* n. sp. (Rhabditida, Heterorhabditidae) from Florida. *Zootaxa* **1177**: 1–19.
- Nylander JAA. 2004.** MrModeltest v2. Program distributed by the author. Uppsala: Evolutionary Biology Centre, Uppsala University.
- Page TJ, Baker AM, Cook BD, Hughes JM. 2005.** Historical transoceanic dispersal of a freshwater shrimp: the colonisation of the South Pacific by the genus *Paratya* (Atyidae). *Journal of Biogeography* **32**: 581–593.
- Posada D, Buckley TR. 2004.** Model selection and model averaging in phylogenetics: advantages of Akaike information criterion and Bayesian approaches over likelihood ratio tests. *Systematics Biology* **53**: 793–808.
- Posada D, Crandall KA. 1998.** Modeltest: testing the model of DNA substitution. *Bioinformatics* **14**: 817–818.
- Powers T. 2004.** Nematode molecular diagnostics: from bands to barcodes. *Annual Review of Phytopathology* **42**: 367–383.
- Quesada H, Wenne R, Skibinski DO. 1999.** Interspecies transfer of female mitochondrial DNA is coupled with role-reversals and departures from neutrality in the mussel *Mytilus trossulus*. *Molecular Biology and Evolution* **16**: 655–665.
- Rocha-Olivares A, Fleeger JW, Foltz DW. 2001.** Decoupling of molecular and morphological evolution in deep lineages of a meiobenthic harpacticoid copepod. *Molecular Biology and Evolution* **18**: 1088–1102.
- Sanderson MJ, Shaffer HB. 2002.** Troubleshooting molecular phylogenetic analyses. *Annual Review of Ecology and Systematics* **33**: 49–72.
- StatSoft Inc. 2001.** STATISTICA (data analysis software system), Version 6. Tulsa, USA: StatSoft Inc.
- Sudhaus W. 1974.** Nematoden (insbesondere Rhabditiden) des Strandanwurfs und ihre Beziehungen zu Krebsen. *Faunistisch-ökologische Mitteilungen* **4**: 365–400.
- Sudhaus W, Fitch D. 2001.** Comparative studies on the phylogeny and systematics of the Rhabditidae (Nematoda). *Journal of Nematology* **33**: 1–70.
- Sudhaus W, Nimrich M. 1989.** Rhabditid nematodes from seaweed deposits in Canada with a description of *Rhabditis (Pellioiditis) littorea* n. sp. *Canadian Journal of Zoology* **67**: 1347–1352.
- Swofford DL. 1998.** PAUP\*. *Phylogenetic analysis using parsimony (\*and other methods)*, Version 4. Sunderland, MA: Sinauer Associates.
- Thompson JD, Gibson TJ, Plewniak F, Jeanmougin F, Higgins DG. 1997.** The Clustal\_X windows interface: flexible strategies for multiple sequence alignment aided by quality analysis tools. *Nucleic Acids Research* **24**: 4876–4882.
- Vincx M. 1996.** Meiofauna in marine and freshwater sediments. In: Hall GS, ed. *Methods for the examination of organismal diversity in soils and sediments*. New York: CAB International, IUBS, UNESCO, 187–195.
- Wiens JJ, Servedio MR. 2000.** Species delimitation in systematics: inferring diagnostic differences between species. *Proceedings of the Royal Society of London. Series B* **267**: 631–636.

## APPENDIX 1

Summary of morphometric data of all genetic lineages in *R. (P.) marina*. Literature data of *R. (P.) marina* (Sudhaus, 1974) and of the congeners *R. (P.) mediterranea* (Sudhaus, 1974), *R. (R.) nidrosiensis* (Ingliš & Coles, 1961), *R. (P.) littorea* (Sudhaus & Nimrich, 1989) and *R. (P.) obesa* (Gagarin, 2001) are included. Values are given in micrometres and as minimum – maximum (average).

|                             | L                | W          | BdL        | Ph            | tail          | a                 | b              | c                 | %V         | Spic       | Testis           |
|-----------------------------|------------------|------------|------------|---------------|---------------|-------------------|----------------|-------------------|------------|------------|------------------|
| <b>Females</b>              |                  |            |            |               |               |                   |                |                   |            |            |                  |
| Z                           | 556–836 (675)    | 22–36 (29) | 11–14(13)  | 127–177 (147) | 39–51 (45)    | 20.1–24.9 (23.2)  | 4.3–4.9 (4.6)  | 13.2–17.2 (14.8)  | 54–57 (56) | –          | –                |
| Z2                          | 985–1088 (1018)  | 45–57 (49) | 15–20 (17) | 189–226 (202) | 73–85 (79)    | 17.2–22.9 (20.8)  | 4.5–5.8 (5.1)  | 11.9–14.0 (12.9)  | 49–59 (54) | –          | –                |
| Z4                          | 1282–1573 (1447) | 56–89 (64) | 15–23 (18) | 207–234 (221) | 73–108 (94)   | 17.5–26.9 (22.6)  | 5.6–7.6 (6.5)  | 13.6–21.26 (15.4) | 48–58 (51) | –          | –                |
| PmI                         | 1626–1798 (1705) | 76–84 (81) | 21–26 (23) | 240–277 (256) | 109–123 (117) | 19.9–21.9 (20.9)  | 6.2–7.2 (6.7)  | 13.4–16.4 (14.6)  | 50–53 (52) | –          | –                |
| PmII                        | 1457–1818 (1638) | 71–92 (81) | 22–26 (24) | 215–326 (270) | 88–103 (95)   | 19.8–20.4 (20.1)  | 5.6–6.8 (6.2)  | 16.6–17.5 (17.0)  | 52–56 (54) | –          | –                |
| PmIII                       | 1095–1514 (1309) | 42–60 (54) | 16–20 (18) | 183–203 (192) | 77–107 (90)   | 21.0–28.6 (24.1)  | 5.8–7.7 (6.7)  | 13.4–15.9 (14.3)  | 50–53 (51) | –          | –                |
| PmIV                        | 1160–1548 (1387) | 51–76(64)  | 19–24 (21) | 220–245 (235) | 97–134 (112)  | 18.9–24.5 (21.8)  | 5.1–6.6 (5.9)  | 10.5–13.8 (12.3)  | 47–53 (50) | –          | –                |
| <i>P. mediterranea</i>      | 1157–1590        | 45–78      | 22–24      | 197–237       | 56–91         | 18.2–25.8         | 5.2–7.0        | 15.7–25.0         | 51–55      | –          | –                |
| <i>P. marina</i>            | 1628–2875        | 69–118     | 30–39      | 237–354       | 99–139        | 20–24.5           | 5.2–8.1        | 14.7–22.0         | 53–57      | –          | –                |
| <i>R. (R.) nidrosiensis</i> | 1380–1640        | –          | –          | –             | –             | 14.9–20.3         | 3.6–4.2        | 18.0–24.8         | 52–56      | –          | –                |
| <i>P. littorea</i>          | 599–900 (731)    | 34–58 (46) | 16–20 (18) | 118–156 (137) | 89–147 (113)  | 14.4–17.8 (15.9)  | 4.7–6.4 (5.3)  | 5.1–8.7 (6.4)     | 47–53 (50) | –          | –                |
| <i>P. obesa</i>             | 1422–1619 (1524) | –          | –          | 361–416 (387) | 52–59 (56)    | –                 | 16.0–20.0 (19) | 23.2–28.9 (25.6)  | 57–59 (58) | –          | –                |
| <b>Males</b>                |                  |            |            |               |               |                   |                |                   |            |            |                  |
| Z                           | 515–870 (635)    | 25–34 (29) | 10–13 (12) | 115–155 (133) | 23–27 (25)    | 15.6–25.1 (21.5)  | 4.3–5.6 (4.7)  | 21.0–31.8 (24.9)  | –          | 30–35 (33) | 338–669 (461)    |
| Z2                          | 822–985 (904)    | 43–53 (48) | 19–19 (19) | 166–179 (173) | 22–37 (29)    | 15.4–22.7 (19.1)  | 4.9–5.5 (5.2)  | 26.5–37.3 (31.9)  | –          | 34–38 (36) | 655–823 (739)    |
| Z4                          | 1084–1413 (1258) | 48–71 (55) | 16–24 (20) | 186–226 (201) | 25–47(36)     | 19.1–25.2 (22.9)  | 5.4–7.3 (6.3)  | 25.7–53.1 (36.6)  | –          | 41–52 (48) | 983–1233 (1101)  |
| PmI                         | 1731–1998 (1864) | 72–87 (79) | 24–28 (26) | 297–312 (304) | 65–79 (69)    | 21.4–27.7 (23.6)  | 5.7–6.4 (6.1)  | 25.2–28.7 (26.8)  | –          | 50–54 (53) | 1205–1555 (1316) |
| PmII                        | 1403–1445 (1424) | 62–62 (62) | 23–23 (23) | 260–280 (270) | 57–60 (58)    | 22.6–23.16 (22.9) | 5.0–5.6 (5.3)  | 24.0–24.3 (24.2)  | –          | 57–64 (61) | 1168–1238 (1203) |
| PmIII                       | 1051–1130 (1090) | 39–32 (36) | 14–16(15)  | 179–163 (171) | 32–41 (36)    | 28.4–32.5 (30.5)  | 6.3–6.4 (6.4)  | 25.1–35.2 (30.2)  | –          | 37–42 (40) | 885–948 (917)    |
| PmIV                        | 1043–1210 (1125) | 47–62 (54) | 18–20 (19) | 202–227 (213) | 56–70 (60)    | 18.9–21.9 (20.6)  | 4.9–5.5 (5.3)  | 17.3–20.0 (18.7)  | –          | 52–62 (57) | 909–1078 (996)   |
| <i>P. mediterranea</i>      | 779–1298         | 32–49      | 19–22      | 153–200       | 22–37         | 18.7–33.2         | 4.4–6.6        | 23.6–41.7         | –          | 31–45      | –                |
| <i>P. marina</i>            | 1337–1978        | 43–71      | 21–31      | 221–291       | 50–59         | 20.9–32.4         | 4.6–7.7        | 22.4–30.2         | –          | 37–57      | –                |
| <i>R. (R.) nidrosiensis</i> | 890–1280         | 52–69      | –          | 217–312       | 27–40         | 17.0–18.3         | 3.2–4.1        | 25.3–32.0         | –          | 62–72      | –                |
| <i>P. littorea</i>          | 400–708 (501)    | 25–45 (33) | 15–20 (16) | 109–159 (125) | 25–33 (28)    | 13.6–19.9 (16.3)  | 3.5–4.8 (3.9)  | 14.6–17.8 (16.2)  | –          | 23–30 (26) | 201–453 (286)    |
| <i>P. obesa</i>             | 1039–1318 (1116) | –          | –          | 322–357 (340) | 28–37 (32)    | –                 | 11.0–19.0 (16) | 35.1–39.2 (37.1)  | –          | 75–84 (79) | –                |
